# Supplementary material for: In Vitro Antiglycation and Methylglyoxal Trapping Effect of Peppermint Leaf (Mentha × piperita L.) and Its Polyphenols
Source: MDPI journal article supplement (doi:10.3390/molecules28062865), 2023-03-22
Supplement: s1 [file s1]

**Supplementary data to:**

“In vitro antiglycation and methylglyoxal trapping effect of peppermint leaf (*Mentha × piperita* L.) and its polyphenols”

Izabela Fecka, Katarzyna Bednarska, Adam Kowalczyk

Department of Pharmacognosy and Herbal Medicines, Faculty of Pharmacy, Wrocław Medical University, ul. Borowska 211, 50-556 Wrocław, Poland

**List of Figures:**

**Figure S1.** MS spectra of luteolin authentic standard.

**Figure S2.** MS spectra of luteolin-MGO mono-adduct 1.

**Figure S3.** MS spectra of luteolin-MGO mono-adduct 2.

**Figure S4.** MS spectra of luteolin-MGO di-adduct.

**Figure S5.** MS spectra of apigenin authentic standard.

**Figure S6.** MS spectra of apigenin-MGO mono-adduct 1.

**Figure S7.** MS spectra of apigenin-MGO mono-adduct 2.

**Figure S8.** MS spectra of apigenin-MGO di-adduct.

**Figure S9.** MS spectra of eriocitrin authentic standard.

**Figure S10.** MS spectra of eriocitrin and eriocitrin-MGO mono-adduct 1.

**Figure S11.** MS spectra of eriocitrin and eriocitrin-MGO mono-adduct 2.

**Figure S12.** MS spectra of eriocitrin and eriocitrin-MGO mono-adduct 3.

**Figure S13.** MS spectra of eriocitrin and eriocitrin-MGO mono-adduct 4.

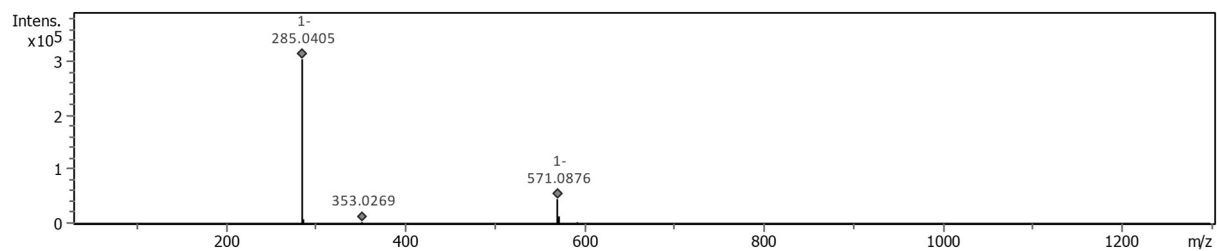

**Figure S1.** MS spectra of luteolin authentic standard.

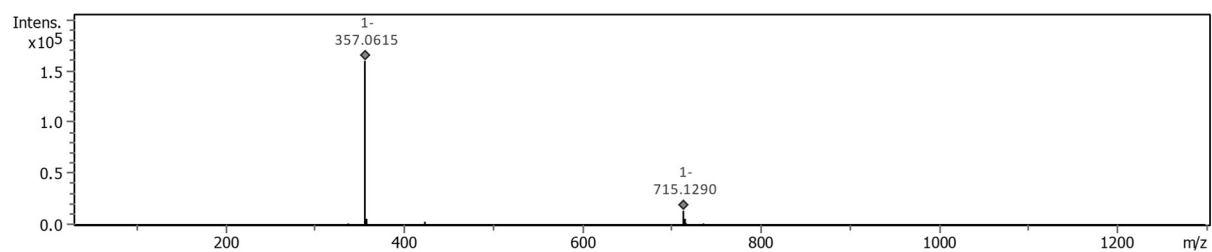

**Figure S2.** MS spectra of luteolin-MGO mono-adduct 1.

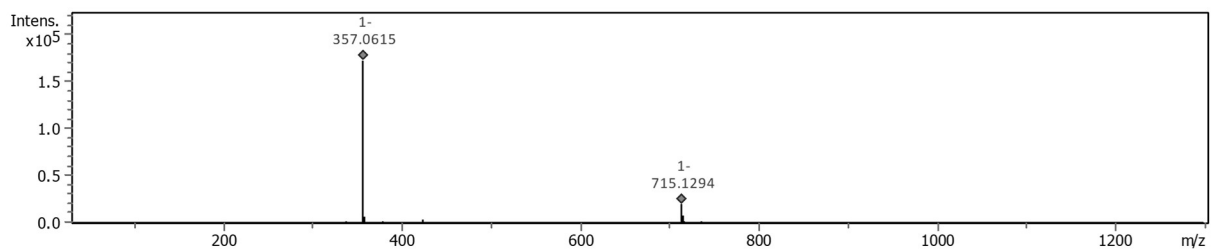

**Figure S3.** MS spectra of luteolin-MGO mono-adduct 2.

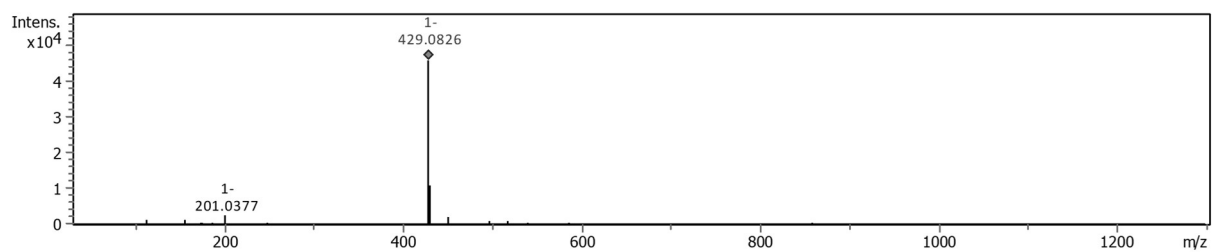

**Figure S4.** MS spectra of luteolin-MGO di-adduct.

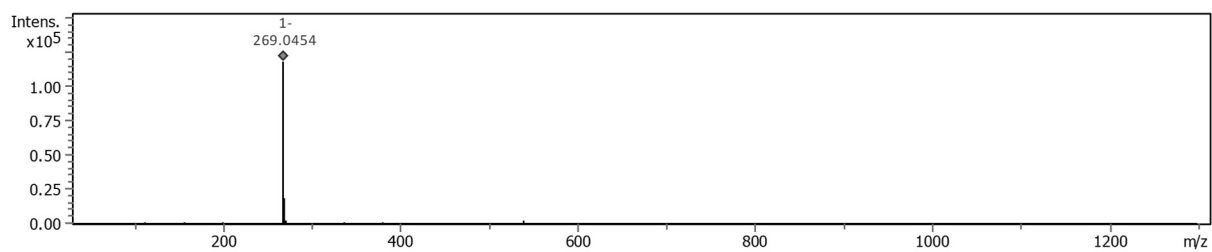

**Figure S5.** MS spectra of apigenin authentic standard.

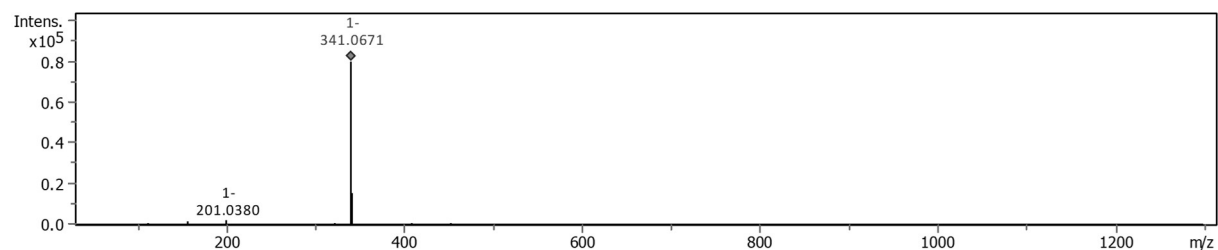

**Figure S6.** MS spectra of apigenin-MGO mono-adduct 1.

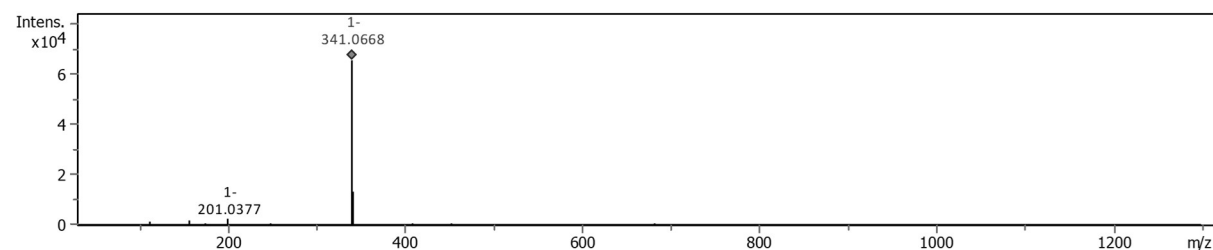

**Figure S7.** MS spectra of apigenin-MGO mono-adduct 2.

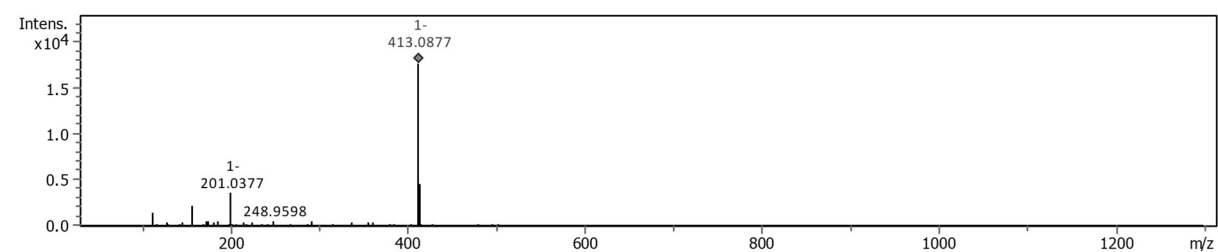

**Figure S8.** MS spectra of apigenin-MGO di-adduct.

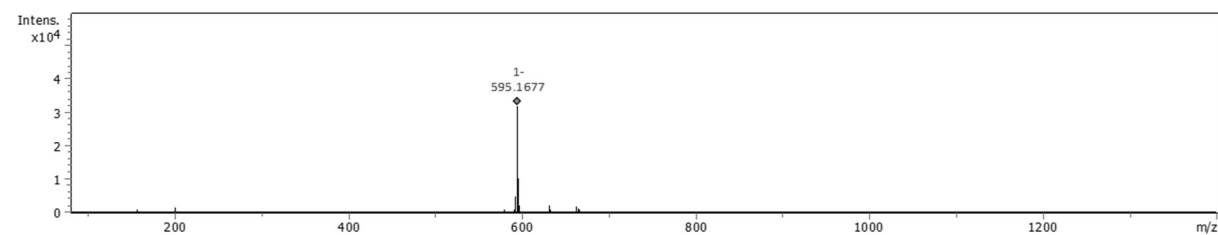

**Figure S9.** MS spectra of eriocitrin authentic standard.

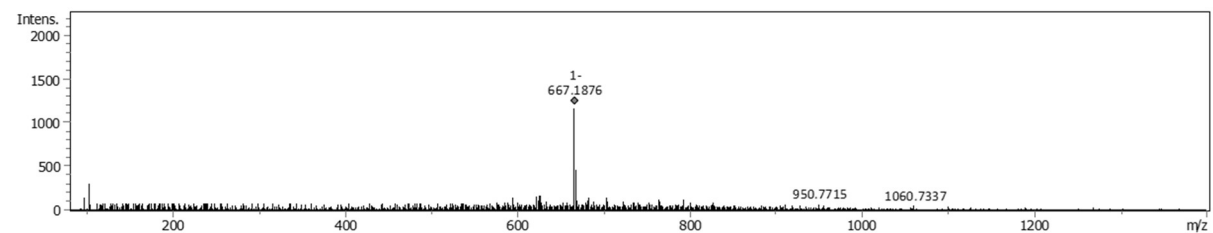

**Figure S10.** MS spectra of eriocitrin and eriocitrin-MGO mono-adduct 1.

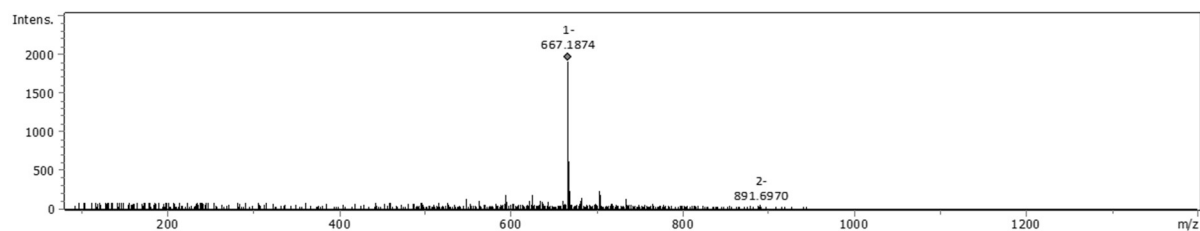

**Figure S11.** MS spectra of eriocitrin and eriocitrin-MGO mono-adduct 2.

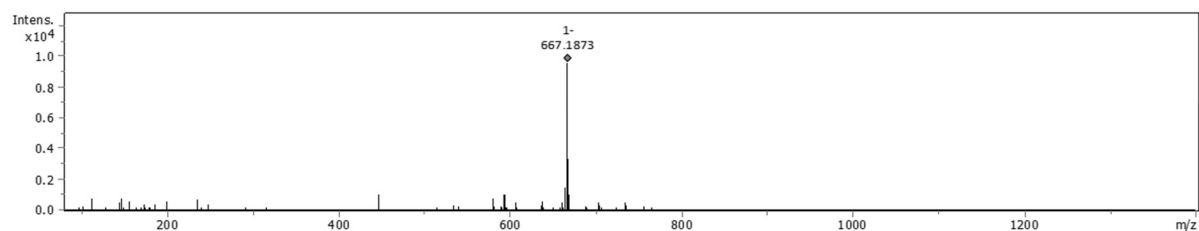

**Figure S12.** MS spectra of eriocitrin and eriocitrin-MGO mono-adduct 3.

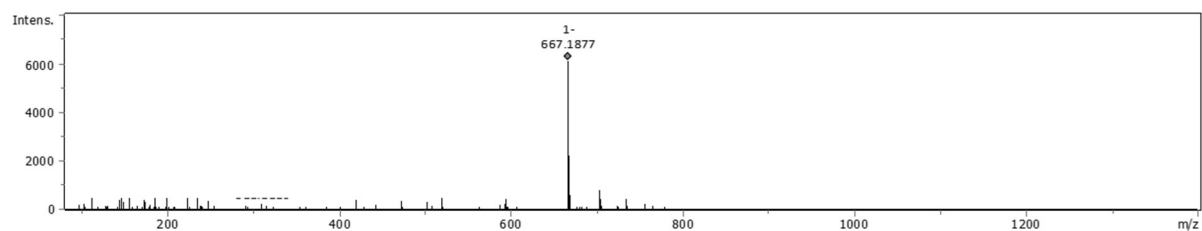

**Figure S13.** MS spectra of eriocitrin and eriocitrin-MGO mono-adduct 4.
